# Supplementary material
Source: publisher site journal article supplement (https://www.jstage.jst.go.jp/article/geochemj/46/3/46_1.0167/_supplement/_download/46_1.0167_1.pdf)
Supplement: Supplementary file 1 [file 46_1.0167_1.pdf]

**Supplemental Table 1: Summary of Mo Concentration Measurements**

|                            | Initial Mo <sub>in</sub> (μM) | Initial Sulfide (μM) | Run #1 ICPMS Mo (μM) | Run #2 ICPMS Mo (μM) | AVG ICPMS Mo (μM) ±2SD |      | MC-ICPMS Mo ppm | Run #3 MC-ICPMS Mo (μM) | MC-ICPMS Mo ppm | Run #4 MC-ICPMS Mo (μM) | AVG MC-ICPMS Mo (μM) ±2SD |       | TOTAL AVG Mo <sub>in</sub> (μM) | ±2SD |
|----------------------------|-------------------------------|----------------------|----------------------|----------------------|------------------------|------|-----------------|-------------------------|-----------------|-------------------------|---------------------------|-------|---------------------------------|------|
| <b>EXPERIMENT SERIES A</b> | <b>0.26</b>                   | <b>0.00</b>          |                      |                      |                        |      |                 |                         |                 |                         |                           |       |                                 |      |
| A-START                    |                               |                      | 0.31                 |                      |                        |      | 0.03            | 0.30                    | 0.03            | 0.30                    | 0.30                      | 0.002 | 0.30                            | 0.02 |
| A1                         |                               |                      | 0.30                 |                      |                        |      | 0.03            | 0.28                    | 0.03            | 0.28                    | 0.28                      | 0.002 | 0.29                            | 0.02 |
| A2                         |                               |                      | 0.30                 | 0.28                 | 0.29                   | 0.04 | 0.03            | 0.26                    | 0.03            | 0.26                    | 0.26                      | 0.001 | 0.28                            | 0.04 |
| A3                         |                               |                      | 0.29                 |                      |                        |      | 0.02            | 0.22                    | 0.02            | 0.22                    | 0.22                      | 0.001 | 0.24                            | 0.07 |
| A4                         |                               |                      | 0.26                 | 0.24                 | 0.25                   | 0.03 | 0.02            | 0.18                    |                 |                         |                           |       | 0.23                            | 0.08 |
| A5                         |                               |                      | 0.11                 |                      |                        |      |                 |                         |                 |                         |                           |       | 0.11                            |      |
| <b>EXPERIMENT SERIES 1</b> | <b>99.1</b>                   | <b>0</b>             |                      |                      |                        |      |                 |                         |                 |                         |                           |       |                                 |      |
| 1 START                    |                               |                      | 56.7                 | 51.5                 | 54                     | 7    | 5.6             | 58.4                    | 5.6             | 58.5                    | 58                        | 0     | 56                              | 7    |
| 1A                         |                               |                      | 45.5                 |                      |                        |      | 4.6             | 48.0                    | 4.5             | 47.2                    | 48                        | 1     | 47                              | 3    |
| 1B                         |                               |                      | 49.3                 |                      |                        |      | 5.1             | 52.9                    | 5.1             | 52.7                    | 53                        | 0     | 52                              | 4    |
| 1C                         |                               |                      | 47.9                 | 44.3                 | 46                     | 5    | 4.5             | 47.4                    |                 |                         |                           |       | 46                              | 4    |
| 1D                         |                               |                      | 43.7                 |                      |                        |      | 4.6             | 47.9                    | 4.6             | 48.3                    | 48                        | 1     | 47                              | 5    |
| 1E                         |                               |                      | 39.7                 | 39.6                 | 40                     | 0    | 4.1             | 43.2                    |                 |                         |                           |       | 41                              | 4    |
| 1F                         |                               |                      | 42.7                 |                      |                        |      | 4.1             | 42.6                    | 4.1             | 42.3                    | 42                        | 0     | 43                              | 0    |
| <b>EXPERIMENT SERIES 2</b> | <b>102.2</b>                  | <b>0</b>             |                      |                      |                        |      |                 |                         |                 |                         |                           |       |                                 |      |
| 2 START                    |                               |                      | 87.0                 | 82.2                 | 85                     | 7    | 8.1             | 84.3                    |                 |                         |                           |       | 84                              | 5    |
| 2A                         |                               |                      | 84.2                 |                      |                        |      | 8.2             | 85.3                    |                 |                         |                           |       | 85                              | 1    |
| 2B                         |                               |                      | 82.0                 | 83.1                 | 83                     | 2    | 8.0             | 83.3                    |                 |                         |                           |       | 83                              | 1    |
| 2C                         |                               |                      | 83.1                 | 89.3                 | 86                     | 9    | 8.1             | 84.1                    |                 |                         |                           |       | 85                              | 7    |
| 2D                         |                               |                      |                      |                      |                        |      | 7.9             | 82.7                    | 9.4             | 98.1                    | 90                        | 22    | 90                              | 22   |
| 2E                         |                               |                      |                      |                      |                        |      | 8.0             | 83.7                    |                 |                         |                           |       | 84                              |      |
| 2F                         |                               |                      | 80.5                 |                      |                        |      | 6.2             | 64.2                    |                 |                         |                           |       | 72                              | 23   |
| <b>EXPERIMENT SERIES 3</b> | <b>102.6</b>                  | <b>~ 420</b>         |                      |                      |                        |      |                 |                         |                 |                         |                           |       |                                 |      |
| 3 START                    |                               |                      | 36.0                 | 32.9                 | 34                     | 4    | 4.8             | 50.4                    | 4.5             | 47.1                    | 49                        | 5     | 42                              | 17   |
| 3A                         |                               |                      | 19.1                 | 18.4                 | 19                     | 1    | 2.4             | 24.7                    | 2.4             | 24.5                    | 25                        | 0     | 22                              | 7    |
| 3B                         |                               |                      | 19.6                 |                      |                        |      | 3.0             | 31.5                    |                 |                         |                           |       | 26                              | 17   |
| 3C                         |                               |                      | 18.9                 | 20.7                 | 20                     | 3    | 2.9             | 30.1                    |                 |                         |                           |       | 23                              | 12   |
| 3D                         |                               |                      | 17.1                 |                      |                        |      | 2.6             | 26.6                    | 2.4             | 25.1                    | 26                        | 2     | 23                              | 10   |
| 3E                         |                               |                      | 18.3                 |                      |                        |      | 2.3             | 26.6                    |                 |                         |                           |       | 22                              | 12   |
| 3F                         |                               |                      | 17.2                 |                      |                        |      | 2.5             | 26.6                    | 2.5             | 26.0                    | 26                        | 1     | 23                              | 10   |
| <b>EXPERIMENT SERIES 4</b> | <b>98.4</b>                   | <b>~ 700</b>         |                      |                      |                        |      |                 |                         |                 |                         |                           |       |                                 |      |
| 4 START                    |                               |                      | 85.6                 | 81.7                 | 84                     | 5    | 7.5             | 78.1                    |                 |                         |                           |       | 82                              | 7    |
| 4A                         |                               |                      | 83.4                 |                      |                        |      | 8.5             | 88.8                    |                 |                         |                           |       | 86                              | 8    |
| 4B                         |                               |                      | 84.2                 |                      |                        |      | 8.5             | 88.6                    |                 |                         |                           |       | 86                              | 6    |
| 4C                         |                               |                      | 84.6                 | 89.4                 | 87                     | 7    | 8.4             | 87.6                    | 9.8             | 101.9                   | 95                        | 20    | 91                              | 15   |
| 4D                         |                               |                      | 84.4                 |                      |                        |      | 8.4             | 87.8                    |                 |                         |                           |       | 86                              | 5    |
| 4E                         |                               |                      | 84.3                 |                      |                        |      | 8.4             | 87.7                    |                 |                         |                           |       | 86                              | 5    |
| 4F                         |                               |                      | 90.2                 |                      |                        |      | 9.4             | 97.9                    |                 |                         |                           |       | 94                              | 11   |

Runs #1 and #2 were measured by ICPMS on independently prepared replicate samples. Runs #3 and #4 were measured by MC-ICPMS on independently prepared replicate samples. Average Mo<sub>in</sub> values and 2-SD errors reported in Table 1 and used for all % Mo Loss calculations.

Supplemental Table 2. Summary of Mo Isotope Measurements

|                            | $\delta^{98}\text{Mo}$ | $\pm 2\text{SD}$ | $\delta^{98}\text{Mo}$ | $\pm 2\text{SD}$ | AVG $\text{Mo}_{\text{aq}}$ |                  |
|----------------------------|------------------------|------------------|------------------------|------------------|-----------------------------|------------------|
|                            | $\delta^{98}\text{Mo}$ |                  | $\delta^{98}\text{Mo}$ |                  | $\delta^{98}\text{Mo}$      | $\pm 2\text{SD}$ |
| <b>EXPERIMENT SERIES A</b> |                        |                  |                        |                  |                             |                  |
| A-START                    | -0.1                   |                  | -0.1                   |                  | <b>-0.1</b>                 | 0.1              |
| A1                         | 0.0                    |                  |                        |                  | <b>0.0</b>                  |                  |
| A2                         | 0.2                    |                  | 0.0                    |                  | <b>0.1</b>                  | 0.2              |
| A3                         | 0.4                    |                  | 0.4                    |                  | <b>0.4</b>                  | 0.0              |
| A4                         | 0.6                    |                  |                        |                  | <b>0.6</b>                  |                  |
| A5                         | na                     |                  |                        |                  |                             |                  |
| <b>EXPERIMENT SERIES 1</b> |                        |                  |                        |                  |                             |                  |
| 1 START                    | 0.2                    |                  | 0.3                    |                  | <b>0.2</b>                  | 0.2              |
| 1A                         | 0.5                    |                  | 0.5                    |                  | <b>0.5</b>                  | 0.0              |
| 1B                         | 0.4                    | 0.0              | 0.3                    |                  | <b>0.4</b>                  | 0.0              |
| 1C                         | 0.3                    |                  |                        |                  | <b>0.3</b>                  |                  |
| 1D                         | 0.2                    |                  | 0.3                    |                  | <b>0.2</b>                  | 0.1              |
| 1E                         | 0.3                    |                  |                        |                  | <b>0.3</b>                  |                  |
| 1F                         | 0.4                    |                  | 0.4                    |                  | <b>0.4</b>                  | 0.1              |
| <b>EXPERIMENT SERIES 2</b> |                        |                  |                        |                  |                             |                  |
| 2 START                    | 0.1                    |                  |                        |                  | <b>0.1</b>                  |                  |
| 2A                         | 0.0                    |                  |                        |                  | <b>0.0</b>                  |                  |
| 2B                         | -0.1                   |                  |                        |                  | <b>-0.1</b>                 |                  |
| 2C                         | 0.0                    |                  |                        |                  | <b>0.0</b>                  |                  |
| 2D                         | 0.0                    |                  | -0.2                   |                  | <b>-0.1</b>                 | 0.2              |
| 2E                         | 0.0                    |                  |                        |                  | <b>0.0</b>                  |                  |
| 2F                         | 0.2                    |                  |                        |                  | <b>0.2</b>                  |                  |
| <b>EXPERIMENT SERIES 3</b> |                        |                  |                        |                  |                             |                  |
| 3 START                    | 0.6                    |                  | 0.4                    |                  | <b>0.5</b>                  | 0.2              |
| 3A                         | 1.0                    | 0.1              | 1.2                    |                  | <b>1.1</b>                  | 0.2              |
| 3B                         | 1.3                    |                  |                        |                  | <b>1.3</b>                  |                  |
| 3C                         | 1.4                    |                  |                        |                  | <b>1.4</b>                  |                  |
| 3D                         | 1.5                    |                  | 1.2                    |                  | <b>1.3</b>                  | 0.3              |
| 3E                         | 1.4                    |                  |                        |                  | <b>1.4</b>                  |                  |
| 3F                         | 1.0                    |                  | 1.2                    |                  | <b>1.1</b>                  | 0.3              |
| <b>EXPERIMENT SERIES 4</b> |                        |                  |                        |                  |                             |                  |
| 4 START                    | 0.0                    |                  |                        |                  | <b>0.0</b>                  |                  |
| 4A                         | 0.0                    |                  |                        |                  | <b>0.0</b>                  |                  |
| 4B                         | -0.1                   |                  |                        |                  | <b>-0.1</b>                 |                  |
| 4C                         | 0.2                    |                  | -0.2                   |                  | <b>0.0</b>                  | 0.5              |
| 4D                         | 0.0                    |                  |                        |                  | <b>0.0</b>                  |                  |
| 4E                         | -0.1                   |                  |                        |                  | <b>-0.1</b>                 |                  |
| 4F                         | -0.1                   |                  |                        |                  | <b>-0.1</b>                 |                  |

Runs #1 and #2 measured by MC-ICPMS on independently prepared replicate samples. For these same samples, the Mo concentrations determined by MC-ICPMS are listed in Supplemental Table 1 (Runs #3 and #4). All errors are 2SD for replicate analyses when available.

**Supplemental Table 3. Summary of Replicate Mo Standard Measurements**

| MC-ICPMS<br>Mo<br>(ppm) | Mo<br>( $\mu$ M) | RUN #1                 |      | RUN #2                 |      | RUN #3                 |      | AVG                    |      |
|-------------------------|------------------|------------------------|------|------------------------|------|------------------------|------|------------------------|------|
|                         |                  | $\delta^{98}\text{Mo}$ | 2-SE | $\delta^{98}\text{Mo}$ | 2-SE | $\delta^{98}\text{Mo}$ | 2-SE | $\delta^{98}\text{Mo}$ | 2-SD |
| 10.24                   | 107              | 0.0                    | 0.1  |                        |      |                        |      | 0.0                    |      |
| 10.22                   | 107              | 0.0                    | 0.0  |                        |      |                        |      | 0.0                    |      |
| 9.79                    | 102              | 0.0                    | 0.0  |                        |      |                        |      | 0.0                    |      |
| 10.23                   | 107              | 0.2                    | 0.0  |                        |      |                        |      | 0.2                    |      |
| 10.21                   | 106              | 0.2                    | 0.1  | 0.2                    | 0.1  | 0.0                    | 0.0  | 0.1                    | 0.2  |
| 10.12                   | 105              | -0.2                   | 0.1  |                        |      |                        |      | -0.2                   |      |
| 10.20                   | 106              | 0.0                    | 0.0  |                        |      |                        |      | 0.0                    |      |
| 10.20                   | 106              | 0.1                    | 0.0  |                        |      |                        |      | 0.1                    |      |
| 9.45                    | 99               | -0.3                   | 0.1  | 0.0                    | 0.0  |                        |      | -0.1                   | 0.4  |
| 9.45                    | 99               | 0.1                    | 0.0  |                        |      |                        |      | 0.1                    |      |
| 9.48                    | 99               | 0.2                    | 0.0  |                        |      |                        |      | 0.2                    |      |
| 10.68                   | 111              | -0.1                   | 0.1  |                        |      |                        |      | -0.1                   |      |
| 11.48                   | 120              | 0.2                    | 0.0  |                        |      |                        |      | 0.2                    |      |
| 11.50                   | 120              | 0.2                    | 0.0  |                        |      |                        |      | 0.2                    |      |
| <b>AVG</b>              | <b>10.2</b>      | <b>107</b>             |      |                        |      |                        |      | <b>0.0</b>             |      |
| 2-SD                    | 1.3              | 13                     |      |                        |      |                        |      | 0.2                    |      |

All samples listed are separate aliquots of a 10 ppm (104  $\mu$ M) Mo standard solution (*Claritas PPT* ICPMS Mo Standard, Lot #CL2-44MO). For these samples, Runs #1, #2, and #3 represent separate Mo isotope analyses of the same individual aliquot.
